# Supplementary material for: Fodinisporobacter ferrooxydans gen. nov., sp. nov.—A Spore-Forming Ferrous-Oxidizing Bacterium Isolated from a Polymetallic Mine
Source: MDPI journal article supplement (doi:10.3390/microorganisms12050853), 2024-04-25
Supplement: s1 [file s1]

## Supplementary

# ***Fodinisporobacter ferrooxydans* gen. nov., sp. nov., a Spore-forming Ferrous-oxidizing Bacterium Isolated from a Polymetallic Mine**

Zhen Jiang<sup>1,2†</sup>, Xiutong Li<sup>1,2†</sup>, Zonglin Liang<sup>1,2</sup>, Zebao Tan<sup>3</sup>, Nan Zhou<sup>1</sup>, Ying Liu<sup>1</sup>, Zhenghua Liu<sup>4</sup>, Huaqun Yin<sup>4</sup>, Kun Luo<sup>3</sup>, Supawadee Ingsriswang<sup>5</sup>, Shuangjiang Liu<sup>1,2,6\*</sup>, Chengying Jiang<sup>1,2\*</sup>

<sup>1</sup> State Key Laboratory of Microbial Resources, Institute of Microbiology, Chinese Academy of Sciences, Beijing 100101, China

<sup>2</sup> University of Chinese Academy of Sciences, Beijing 100049, China

<sup>3</sup> College of Plant Protection, Hunan Agricultural University, Changsha 410128, Hunan, China

<sup>4</sup> Key Laboratory of Biomaterials of Ministry of Education, School of Minerals Processing and Bioengineering, Central South University, Changsha 410083, China

<sup>5</sup> Thailand Bioresource Research Center (TBRC), National Center for Genetic Engineering and Biotechnology (BIOTEC), National Science and Technology Development Agency (NSTDA), Pathum Thani 12120, Thailand

<sup>6</sup> State Key Laboratory of Microbial Biotechnology, Shandong University, Qingdao 266237, China

\*Corresponding author: Chengying Jiang, [jiangcy@im.ac.cn](mailto:jiangcy@im.ac.cn); Shuangjiang Liu, [liusj@im.ac.cn](mailto:liusj@im.ac.cn)

<sup>†</sup>These authors contributed equally to this study.

**Table S1.** Results of acid production (API 50CH), assimilation of carbon sources (API 20NE), enzymatic activities (API ZYM) and other biochemical characteristics (API 20NE) of strain MYW30-H2<sup>T</sup>. +, positive; –, negative; W, weak positive.

| <b>Acid Production from (API 50CH):</b> |   | <b>Assimilation of (API 20NE):</b>        |   |
|-----------------------------------------|---|-------------------------------------------|---|
| Glycerol                                | – | D-Glucose                                 | + |
| Erythritol                              | – | L-Arabinose                               | + |
| D-Arabinose                             | – | D-Mannose                                 | + |
| L-Arabinose                             | – | D-Mannitol                                | + |
| D-Ribose                                | – | N-acetyl-glucosamine                      | – |
| D-Xylose                                | – | D-Maltose                                 | – |
| L-Xylose                                | – | Gluconate                                 | – |
| D-Adonitol                              | – | Capric acid                               | – |
| Methyl- $\beta$ -D-xylopyranoside       | – | Adipic acid                               | – |
| D-Galactose                             | – | Malic acid                                | – |
| D-Glucose                               | – | Trisodium citrate                         | – |
| D-Fructose                              | – | Phenylacetic acid                         | – |
| D-Mannose                               | – | <b>Enzymatic activities of (API ZYM):</b> |   |
| L-Sorbose                               | + | Alkaline phosphatase                      | – |
| L-Rhamnose                              | – | Esterase (C 4)                            | – |
| Dulcitol                                | + | Esterase lipase (C 8)                     | – |
| Inositol                                | + | Lipase (C 14)                             | – |
| D-Mannitol                              | – | Leucine arylamidase                       | – |
| D-Sorbitol                              | – | Valine arylamidase                        | – |
| Methyl- $\alpha$ -D-mannopyranoside     | + | Cystine arylaminase                       | – |
| Methyl- $\alpha$ -D-glucopyranoside     | – | Trypsin                                   | – |
| N-acetyl-glucosamine                    | + | $\alpha$ -Chymotrypsin                    | – |
| Amygdalin                               | + | Acid phosphatase                          | + |
| Arbutin                                 | – | Naphthol-AS-BI-phosphohydrolase           | + |
| Esculin                                 | + | $\alpha$ -galactosidase                   | – |
| Salicine                                | – | $\beta$ -galactosidase                    | – |
| D-Cellobiose                            | – | $\beta$ -glucuronidase                    | – |
| D-Maltose                               | – | $\alpha$ -glucosidase                     | + |
| D-Lactose                               | – | $\beta$ -glucosidase                      | – |
| D-Melibiose                             | – | N-acetyl-glucosaminidase                  | W |
| D-Sucrose                               | – | $\alpha$ -mannosidase                     | – |
| D-Trehalose                             | – | $\beta$ -fucosidase                       | – |

|                 |   |                                                      |   |
|-----------------|---|------------------------------------------------------|---|
| Inulin          | + | <b>Other biochemical characteristics (API 20NE):</b> |   |
| D-Melezitose    | – | Nitrate reduction                                    | + |
| D-Raffinose     | – | indole production                                    | – |
| Starch          | + | Glucose fermentation                                 | + |
| Glycogen        | + | Arginine dihydrolase                                 | – |
| Xylitol         | – | Urea hydrolysis (Urease)                             | W |
| Gentiobiose     | – | Esculin hydrolysis                                   | + |
| D-Turanose      | – | Gelatin hydrolysis ( $\beta$ -glucosidase)           | – |
| D-Lyxose        | – | $\beta$ -galactosidase                               | + |
| D-Tagatose      | + |                                                      |   |
| D-Fucose        | + |                                                      |   |
| L-Fucose        | + |                                                      |   |
| D-Arabitol      | – |                                                      |   |
| L-Arabitol      | + |                                                      |   |
| Gluconate       | + |                                                      |   |
| 2-ketogluconate | + |                                                      |   |
| 5-ketogluconate | – |                                                      |   |

**Table S2.** General genomic characteristics of strain MYW30-H2<sup>T</sup>.

| <b>Characteristics</b>     | <b>MYW30-H2<sup>T</sup></b> |
|----------------------------|-----------------------------|
| <b>INSDC number</b>        | CP089291                    |
| <b>Sequencing depth</b>    | 328.8×                      |
| <b>Number of replicons</b> | 1                           |
| <b>Genome size</b>         | 4856687 bp                  |
| <b>G+C content</b>         | 44.2%                       |
| <b>Total genes</b>         | 4620                        |
| <b>tRNA genes</b>          | 114                         |
| <b>5S rRNA genes</b>       | 12                          |
| <b>16S rRNA genes</b>      | 12                          |
| <b>23S rRNA genes</b>      | 12                          |
| <b>Other RNA genes</b>     | 4                           |
